# Supplementary material for: Regulation of amyloid-β levels by matrix metalloproteinase-2/9 (MMP2/9) in the media of lung cancer cells
Source: PubMed Central journal article supplement (PMC8102533; doi:10.1038/s41598-021-88574-0), 2021-05-06
Supplement: 41598_2021_88574_MOESM1_ESM.pdf [file 41598_2021_88574_MOESM1_ESM.pdf]

Manuscript: Regulation of Amyloid- $\beta$  Levels by Matrix Metalloproteinase-2/9 (MMP2/9) in the Media of Lung Cancer Cells

Ref: Submission ID 1d1d7fd0-b258-4ec4-bf5e-8cc8af9433cf

**Uncropped Images**

MMP9 Uncropped Image

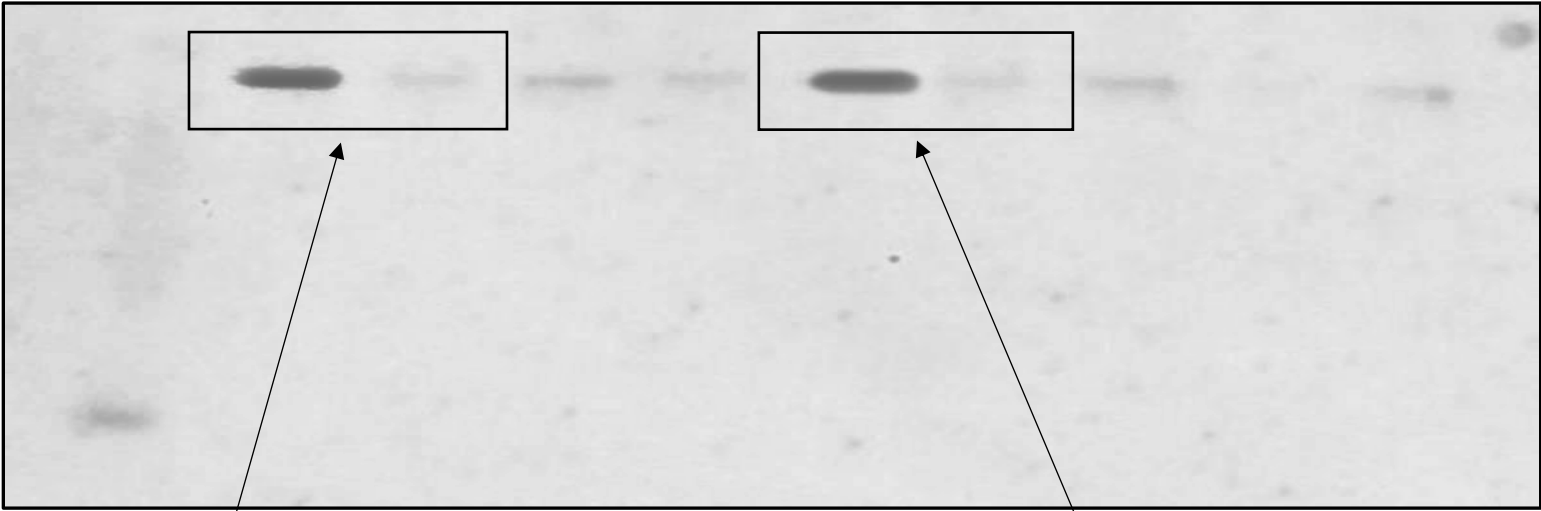

H1299

A549

Control siRNA    MMP9 siRNA

Control siRNA    MMP9 siRNA

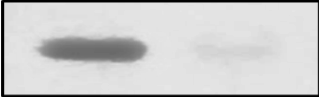

WB: Anti-MMP9

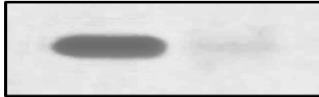

WB: Anti-MMP9

A549

H1299

Control siRNA    MMP9 siRNA

Control siRNA    MMP9 siRNA

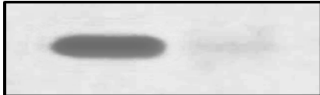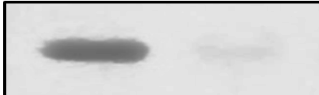

WB: Anti-MMP9

Shown on Figure 7

# MMP2 Uncropped Image

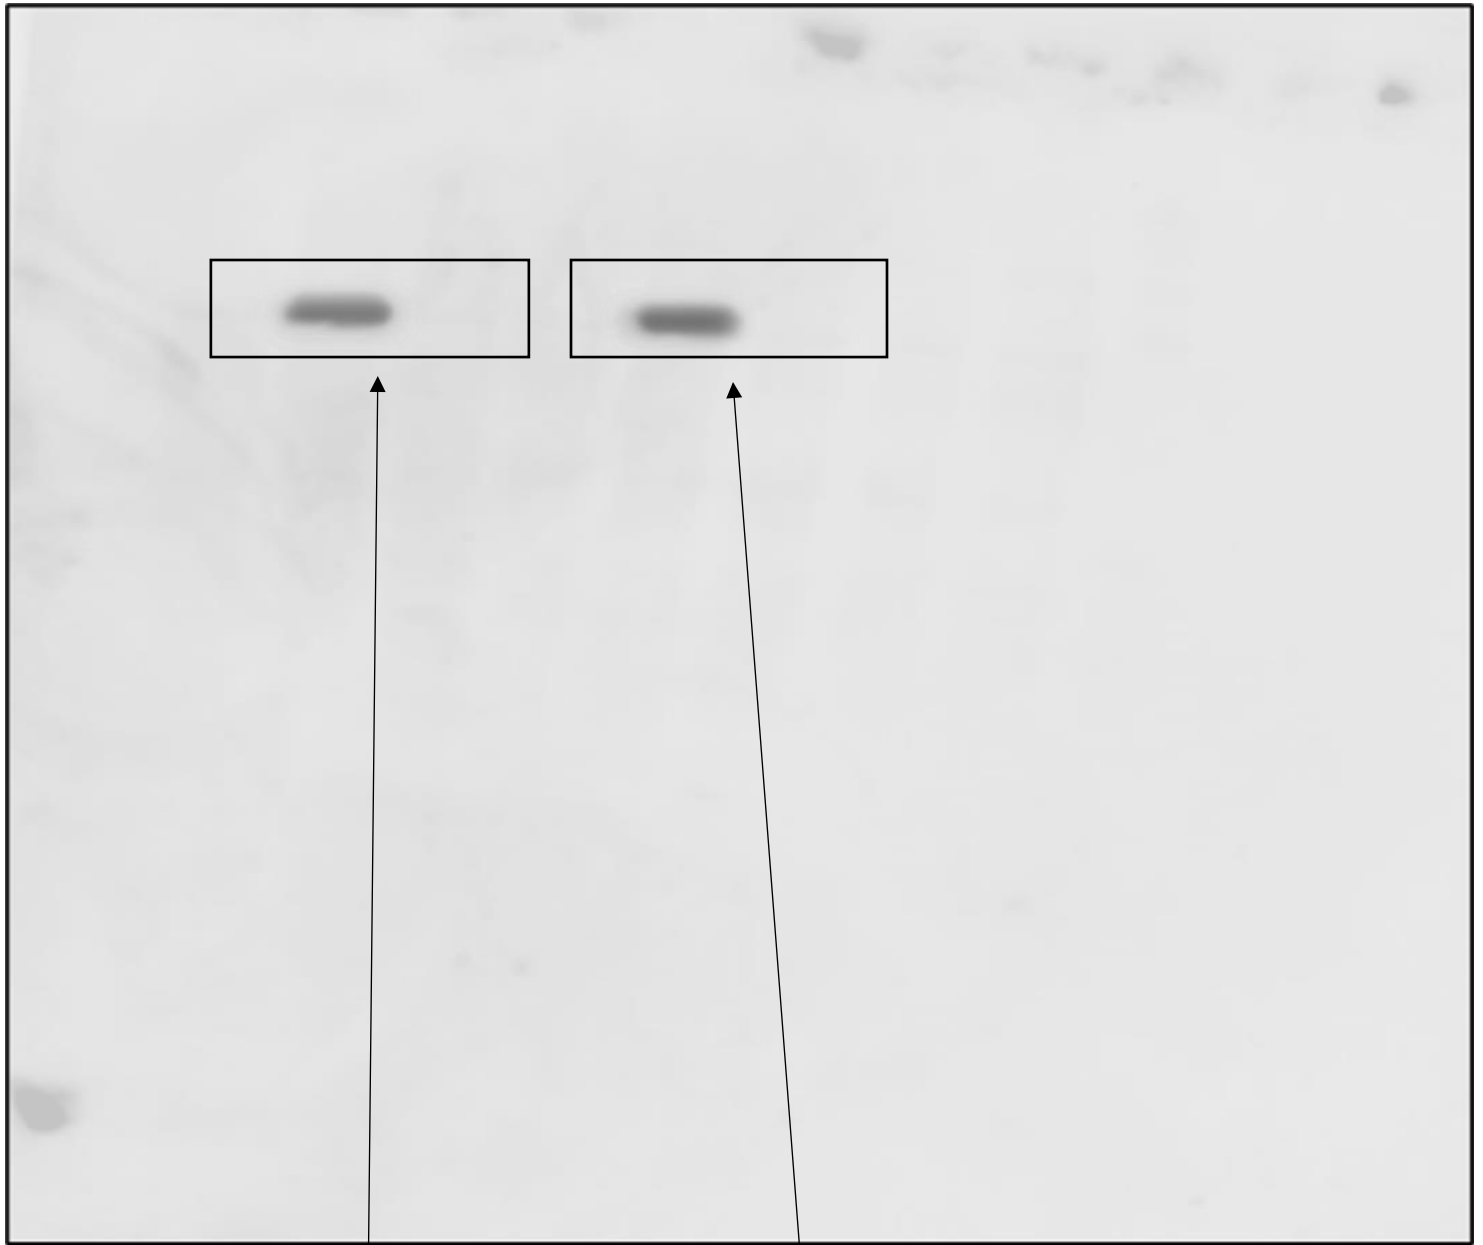

A549

H1299

Control siRNA    MMP2 siRNA

Control siRNA    MMP2 siRNA

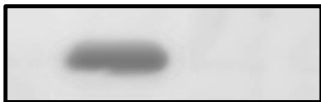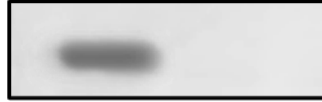

WB: Anti-MMP2

A549

H1299

Control siRNA    MMP2 siRNA

Control siRNA    MMP2 siRNA

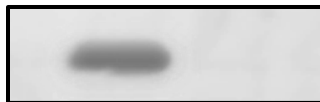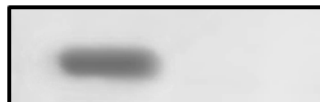

WB: Anti-MMP2

Shown on Figure 7

# P53 Uncropped Western

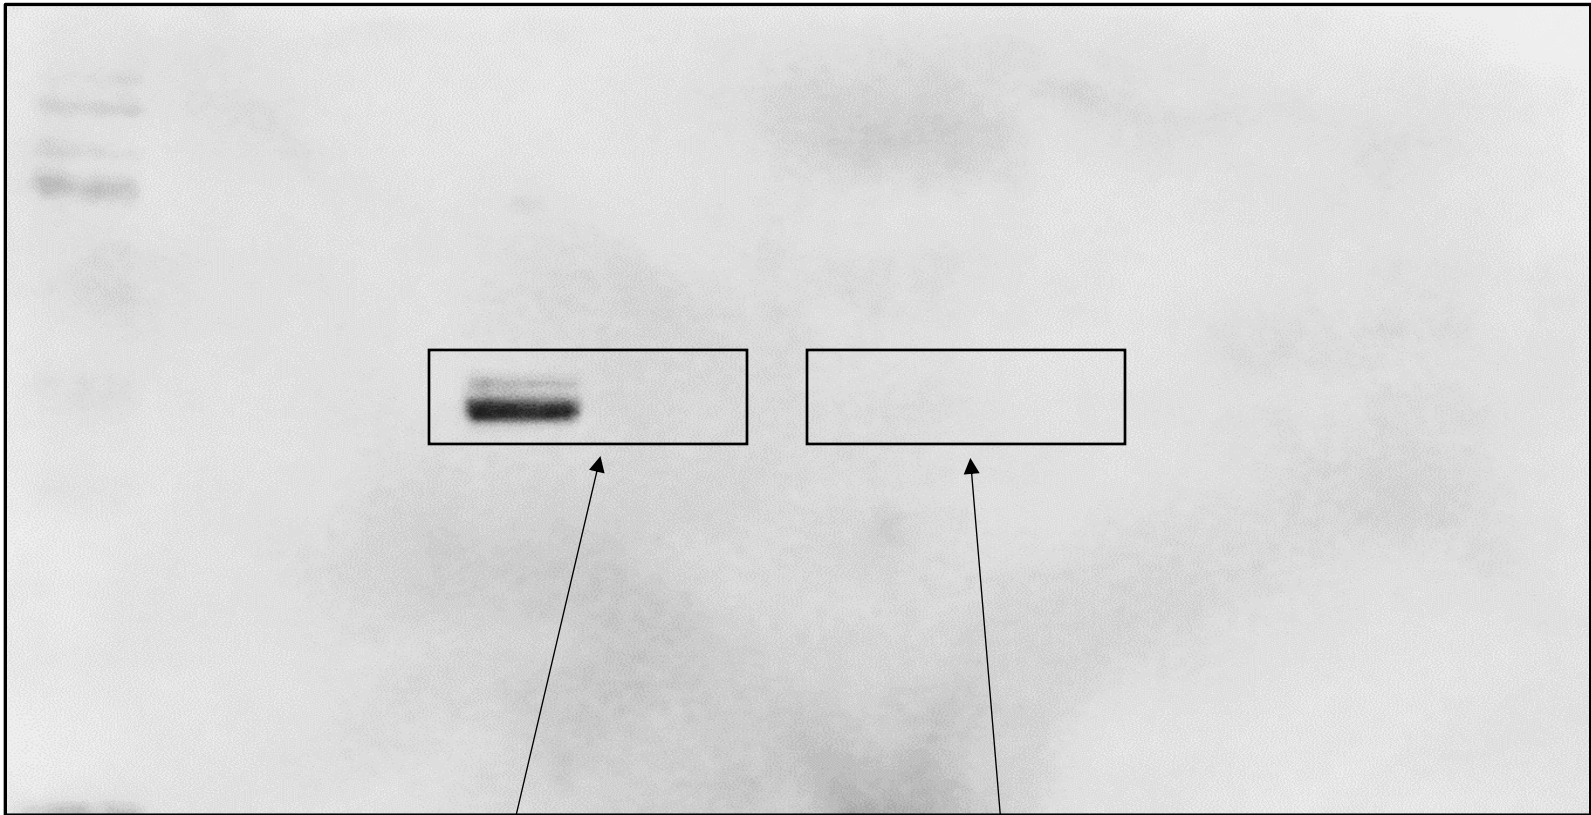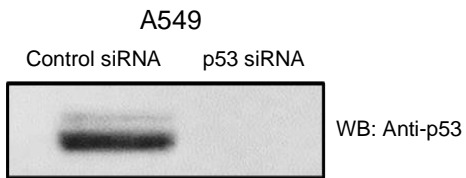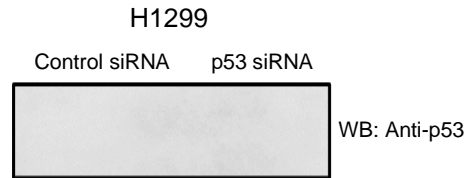

Shown on Figure 7

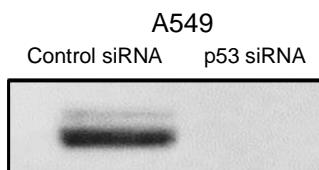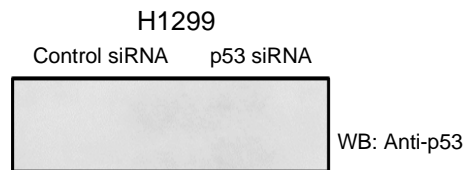

# AKT Uncropped Image

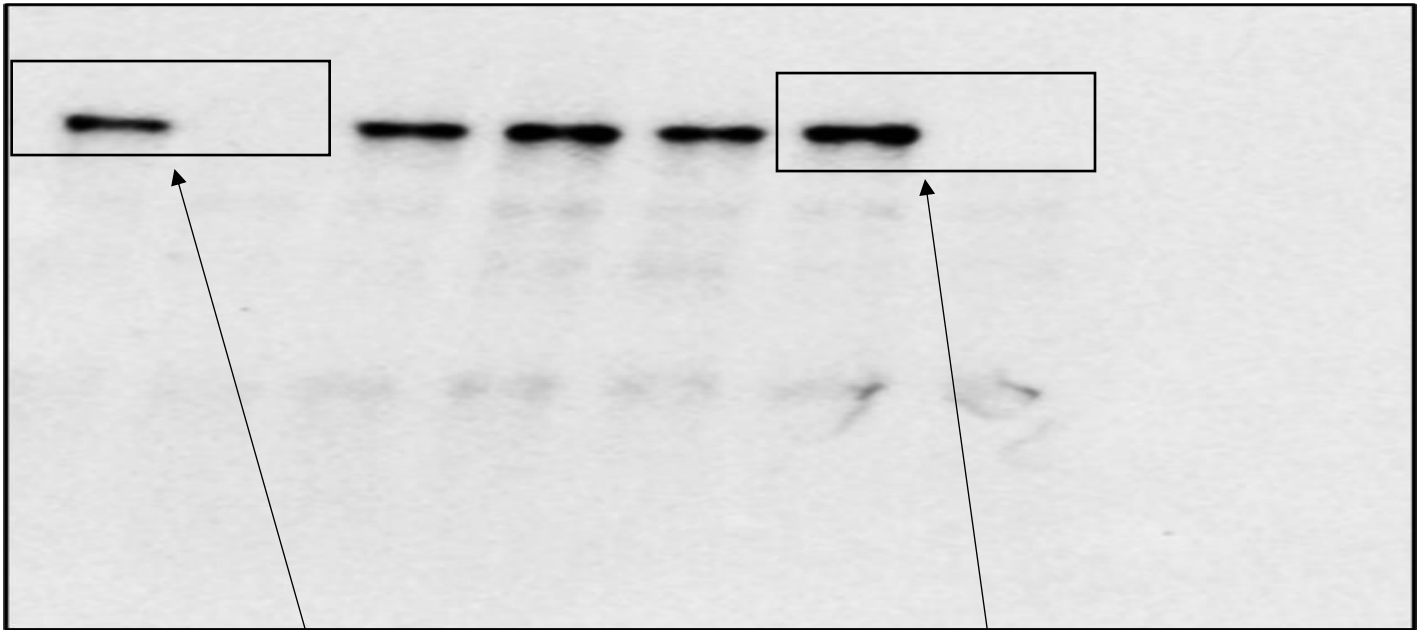

A549

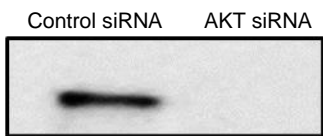

H1299

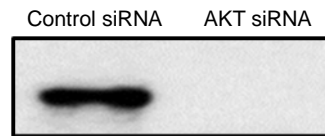

H1299

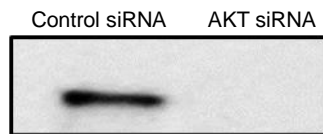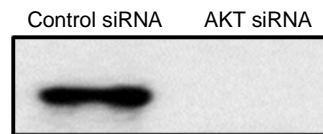

Shown on Figure 7

# Ponceau Uncropped (A549)

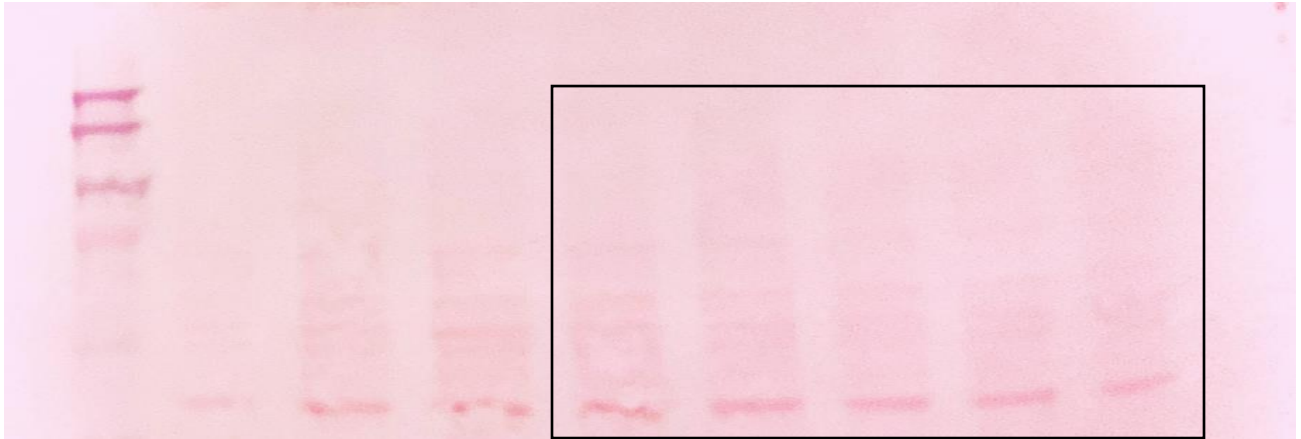

The cropped image on the right was minimized using the upper right-hand corner to produce the image shown in Figure 7.

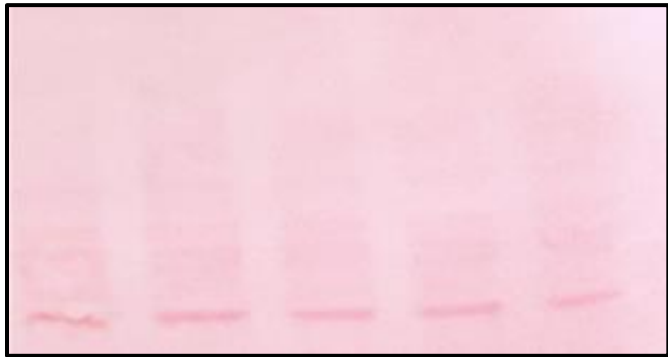

Ponceau (A549)

siRNA: Control MMP9 MMP2 p53 AKT

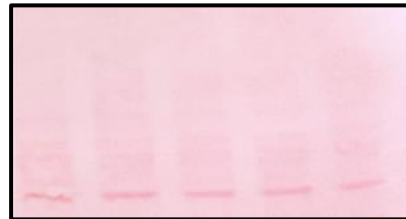

Shown on Figure 7

# Uncropped Tubulin (A549)

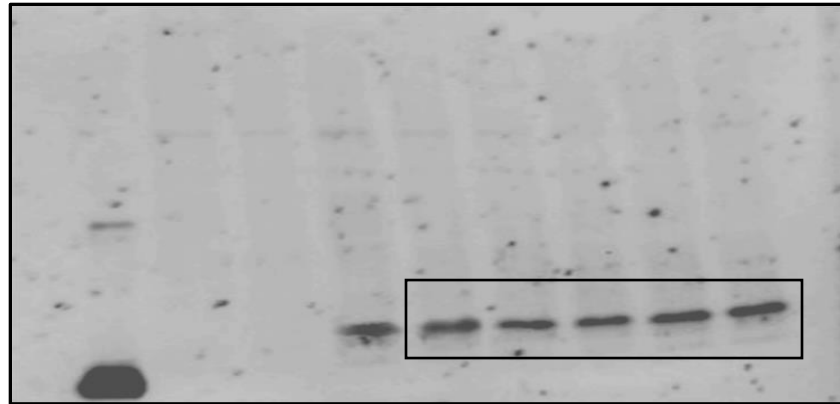

A549

Shown on Figure 7

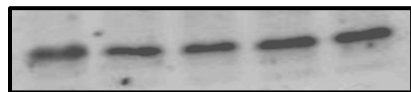

WB: Anti  
 $\alpha$ - tubulin

# Ponceau Uncropped (H1299)

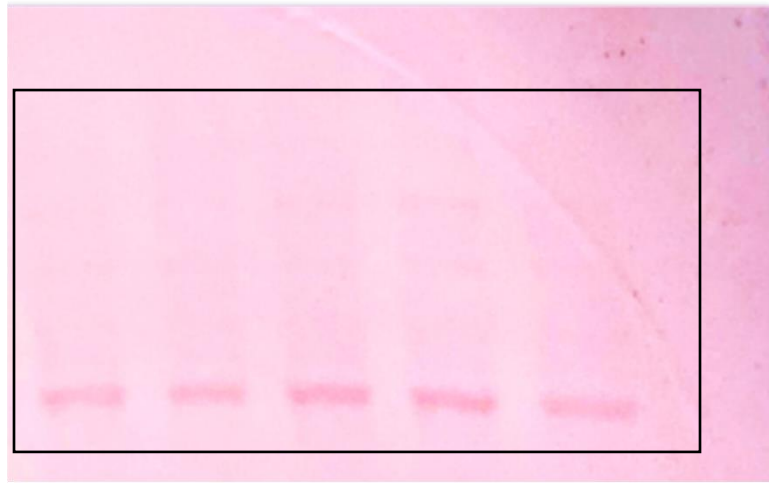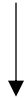

The cropped image on the right was minimized using the upper right-hand corner to produce the image shown in Figure 7.

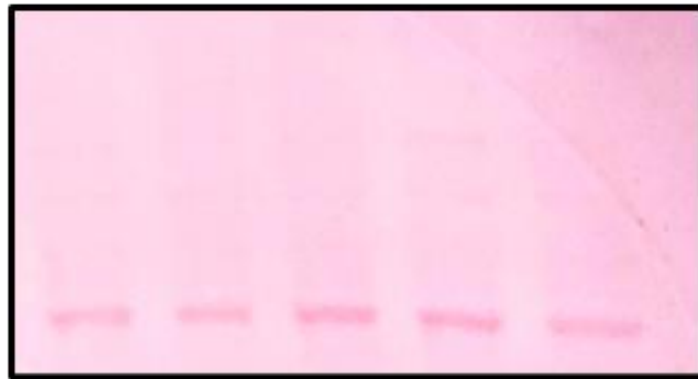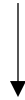

## Ponceau (H1299)

siRNA: Control MMP9 MMP2 p53 AKT

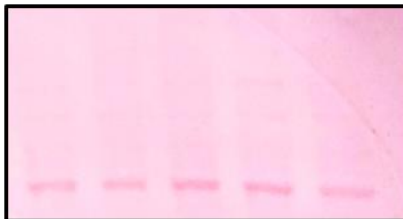

Shown on Figure 7

# Uncropped Tubulin (H1299)

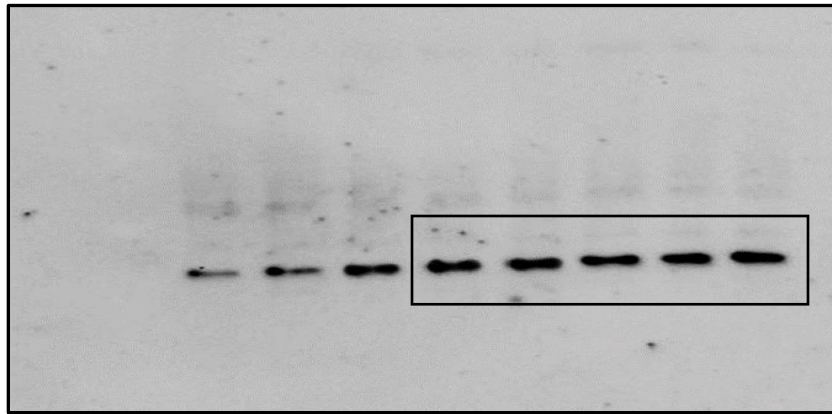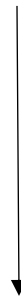

H1299

Shown on Figure 7

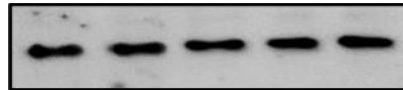

WB: Anti  
 $\alpha$ - tubulin
